# Supplementary material for: A real-time colorimetric and ratiometric fluorescent probe for rapid detection of SO2 derivatives in living cells based on a near-infrared benzopyrylium dye
Source: Royal Society of Chemistry journal article supplement (doi:10.1039/c4ra15067h), 2015-01-01
Supplement: c4ra15067h1.pdf [file c4ra15067h1.pdf]

*Supplementary Information*

**A real-time colorimetric and ratiometric fluorescent probe for rapid detection of SO<sub>2</sub> derivatives in living cells based on a near-infrared benzopyrylium dye**

Wenqiang Chen,<sup>a</sup> Xingjiang Liu,<sup>a</sup> Song Chen<sup>b</sup>, Xiangzhi Song<sup>\*ac</sup> and Jian Kang<sup>\*d</sup>

<sup>a</sup>College of Chemistry & Chemical Engineering, Central South University, 410083 Changsha, Hunan Province, P. R. China. Fax: +86-731-88836954; Tel: +86-731-88836954; E-mail: xzsong@csu.edu.cn;

<sup>b</sup>College of Pharmacy, Qiqihar Medical University, 161006 Qiqihar, Heilongjiang Province, P. R. China;

<sup>c</sup>State Key Laboratory of Fine Chemicals, Dalian University of Technology, 116024 Dalian, Liaoning Province, P. R. China;

<sup>d</sup>The Third Xiangya Hospital, Central South University, 410013 Changsha, Hunan Province, P. R. China.

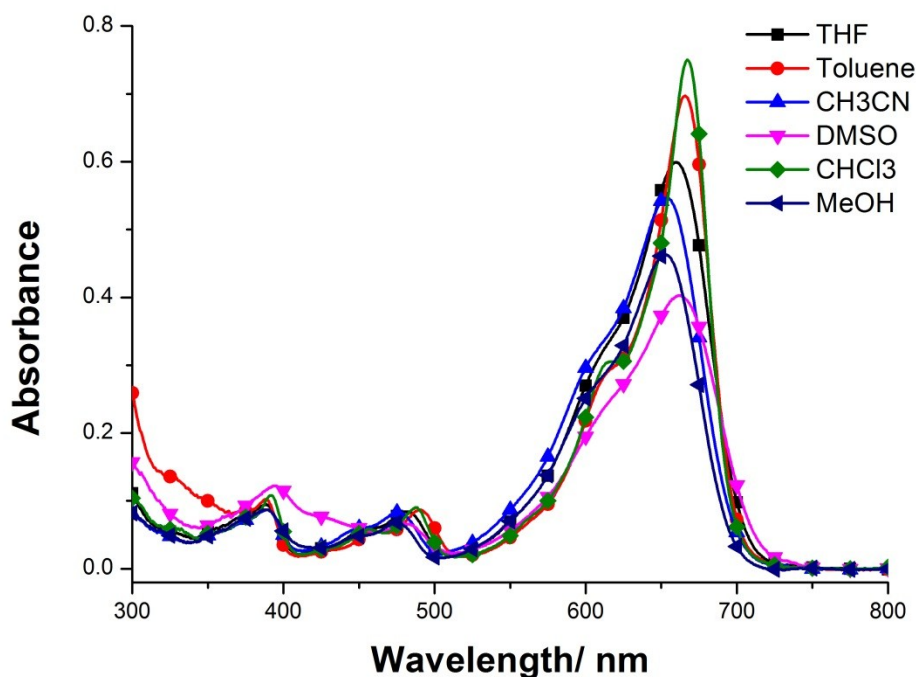

**Figure S1.** Uv-vis absorption spectra of Probe 1 in different solvents.

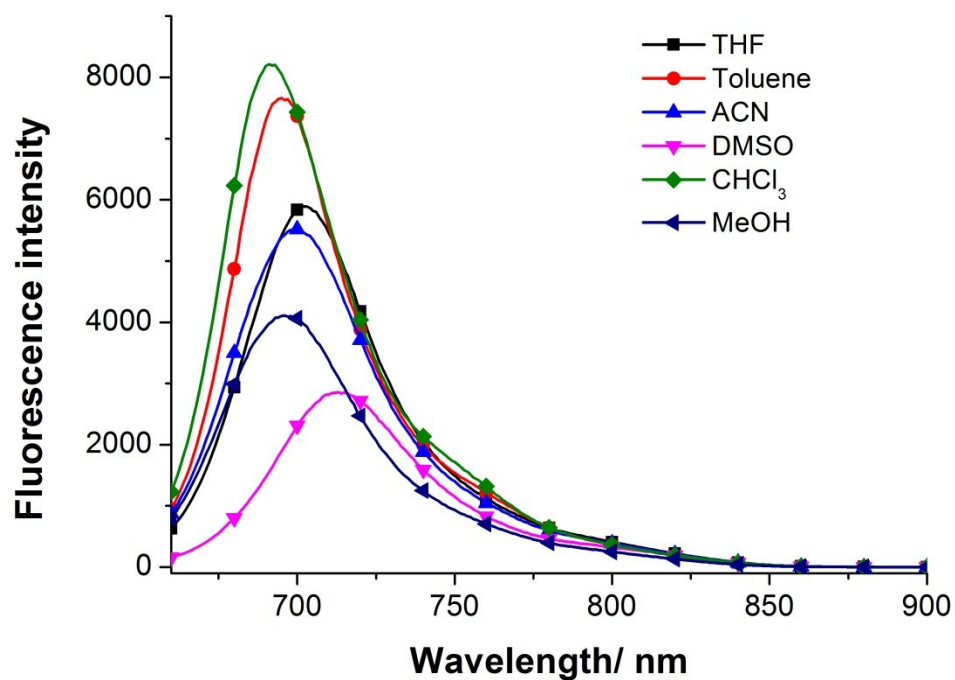

Figure S2. Fluorescence spectra of Probe 1 in different solvents.

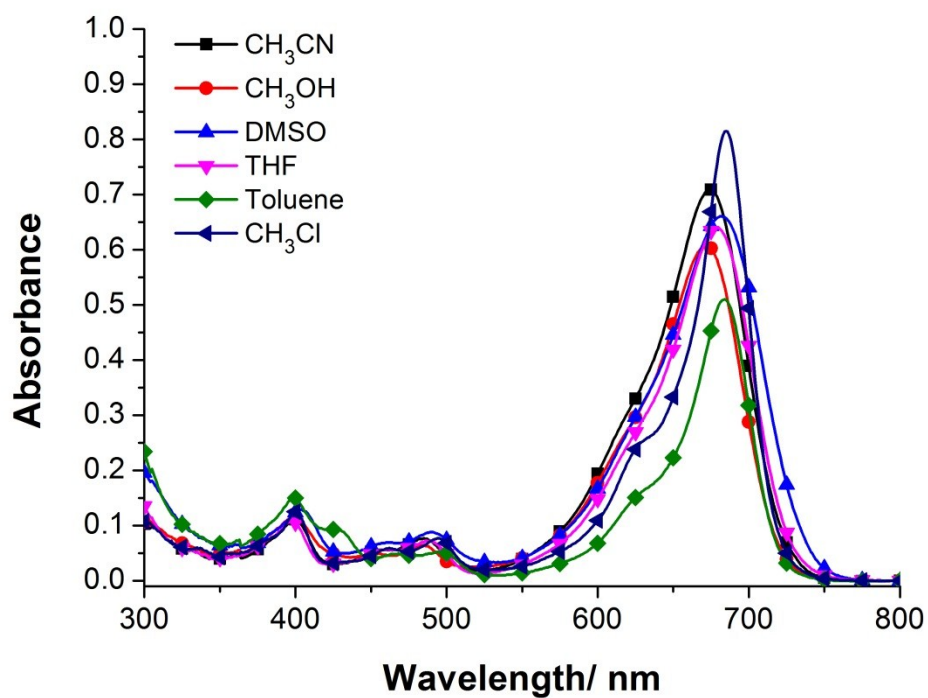

Figure S3. Uv-vis absorption spectra of Probe 2 in different solvents.

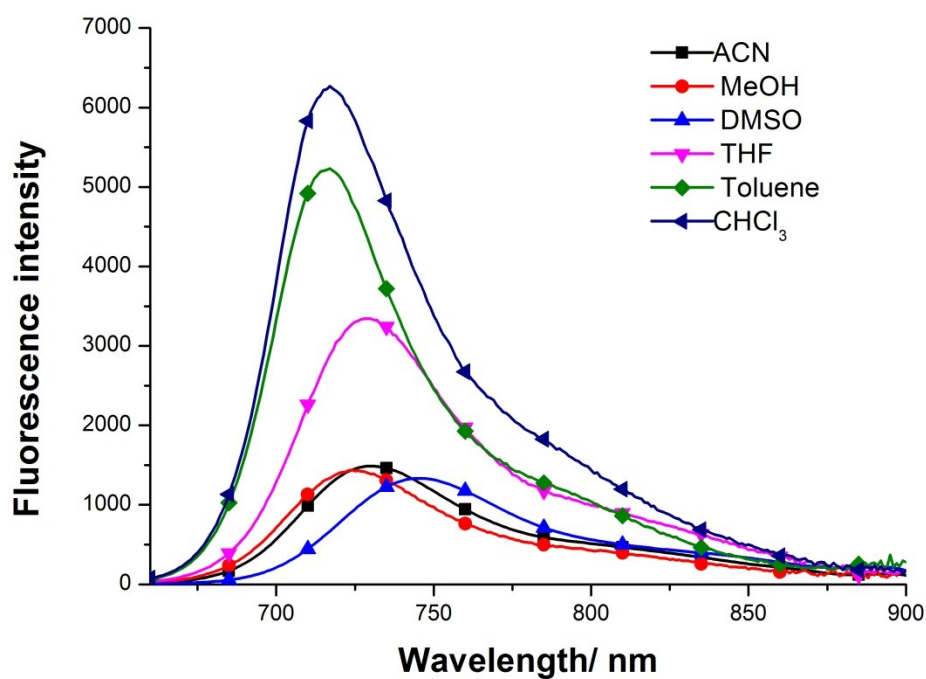

**Figure S4.** Fluorescence spectra of Probe 2 in different solvents.

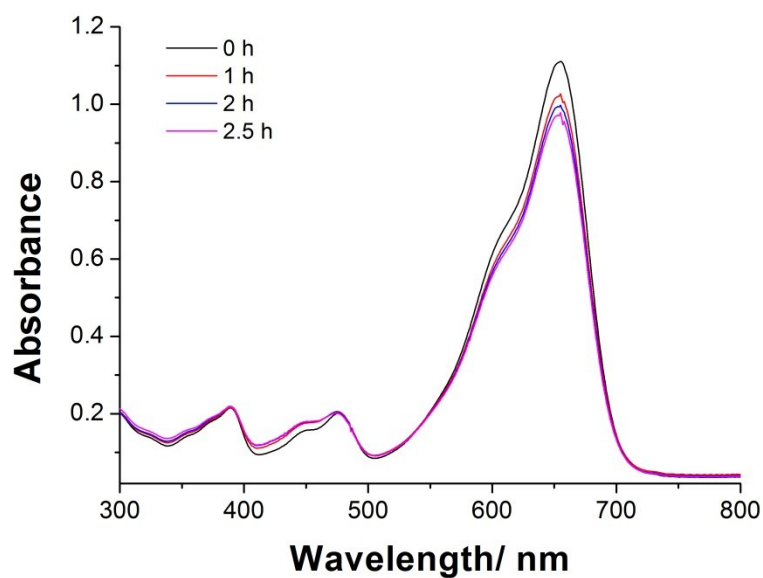

**Figure S5.** Photodegradation of Probe 1 in CH<sub>3</sub>CN under the continuous irradiation with a 300 mW, 635 nm continuous wave laser. The distance between the light source and the sample is 10 cm.

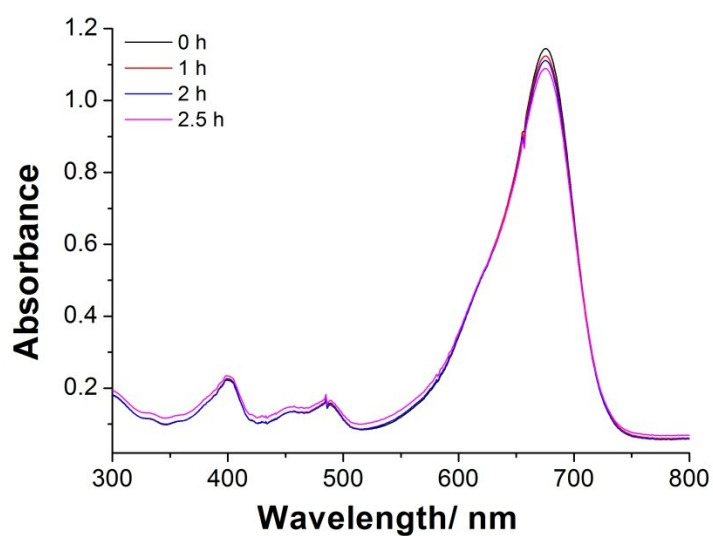

**Figure S6.** Photodegradation of Probe 2 in CH<sub>3</sub>CN under the continuous irradiation with a 300 mW, 635 nm continuous wave laser. The distance between the light source and the sample is 10 cm.

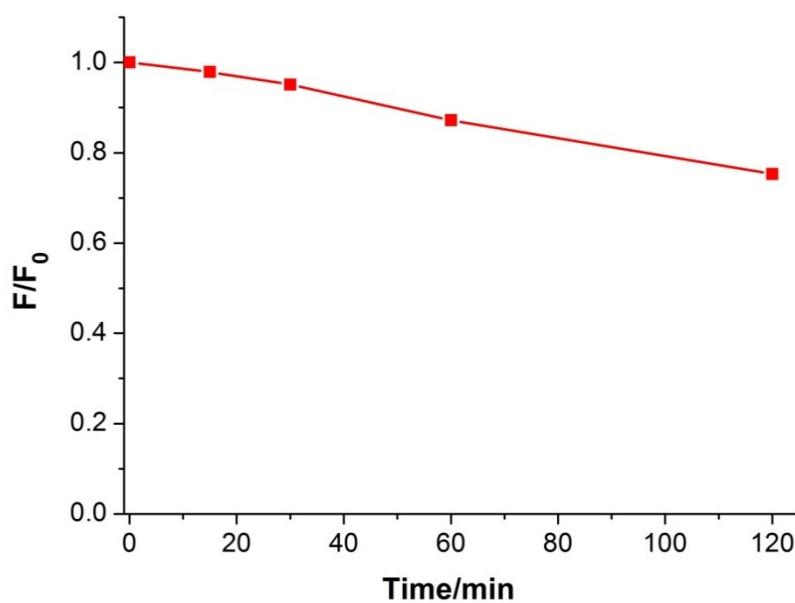

**Figure S7.** Photodegradation of Probe 1 in CH<sub>3</sub>CN under the continuous irradiation with a 300 mW, 635 nm CW laser.  $F$  and  $F_0$  are the fluorescent intensities of the sample and reference, respectively. The distance between the light source and the sample is 10 cm. The optical density of the sample is 0.3.

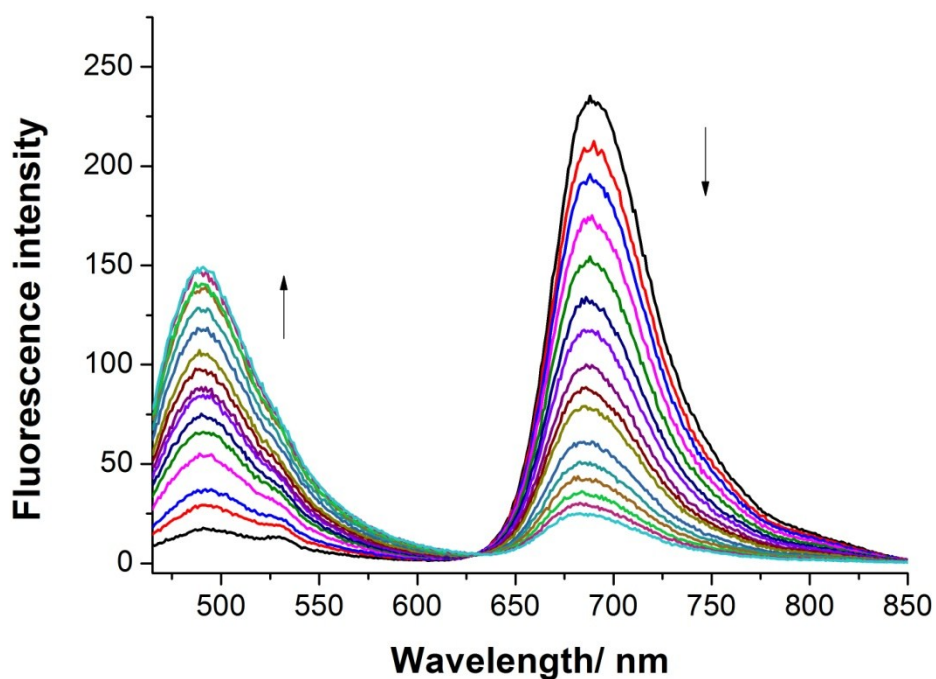

**Figure S8.** Fluorescence spectra changes of the Probe **1** ( $5.0 \mu\text{M}$ ) in presence of  $\text{Na}_2\text{SO}_3$  ( $0.0\text{--}30.0 \mu\text{M}$ ) in HEPES buffer ( $20.0 \text{ mM}$ ,  $\text{pH} = 7.4$ ).

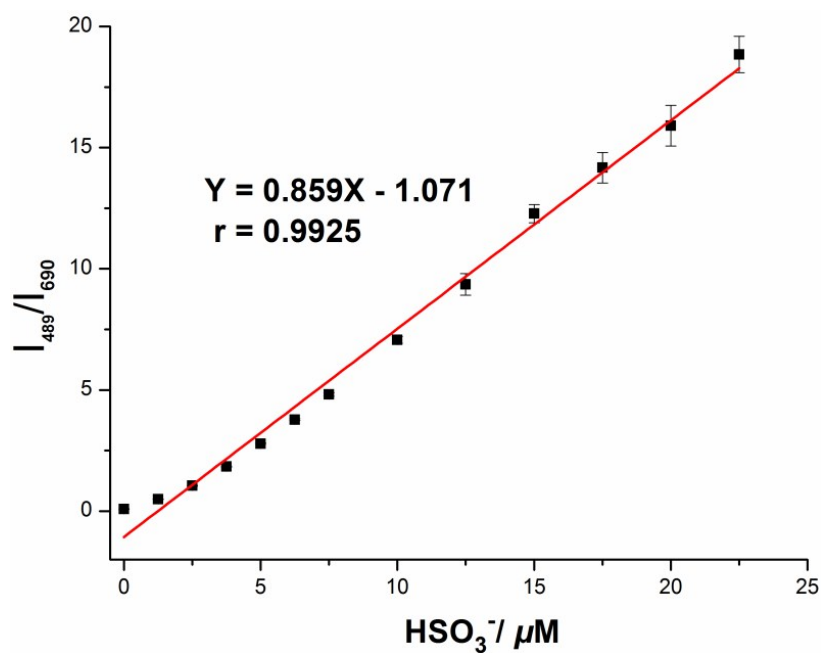

**Figure S9.** The line relationship between the fluorescence ratio ( $I_{489} / I_{690}$ ) of Probe **1** ( $5.0 \mu\text{M}$ ) and the concentration of  $\text{HSO}_3^-$  ( $0.0\text{--}22.5 \mu\text{M}$ ) in HEPES buffer ( $20.0 \text{ mM}$ ,  $\text{pH} = 7.4$ ).

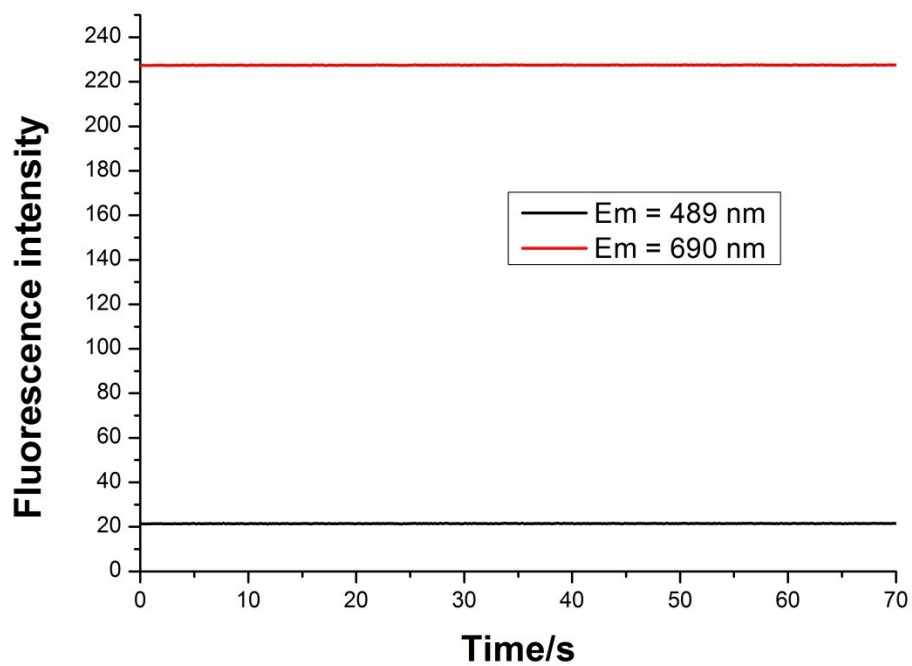

**Figure S10.** Time-dependent Fluorescence spectral changes of Probe 1 ( $5.0 \mu\text{M}$ ) in HEPES buffer ( $20.0 \text{ mM}$ ,  $\text{pH} = 7.4$ ).

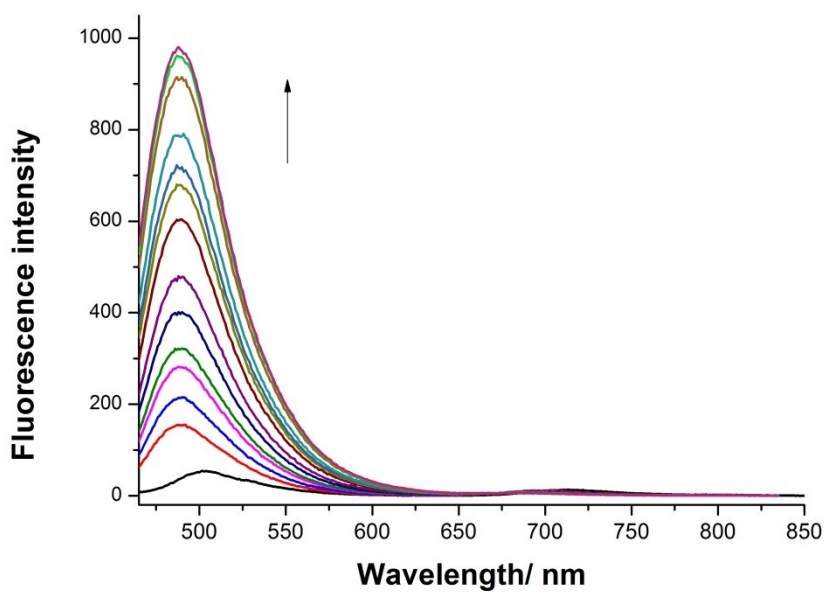

**Figure S11.** Emission spectra of Probe 2 ( $5.0 \mu\text{M}$ ) upon the addition of different

concentrations of NaHSO<sub>3</sub> (0.0-30.0 μM) in HEPES buffer.

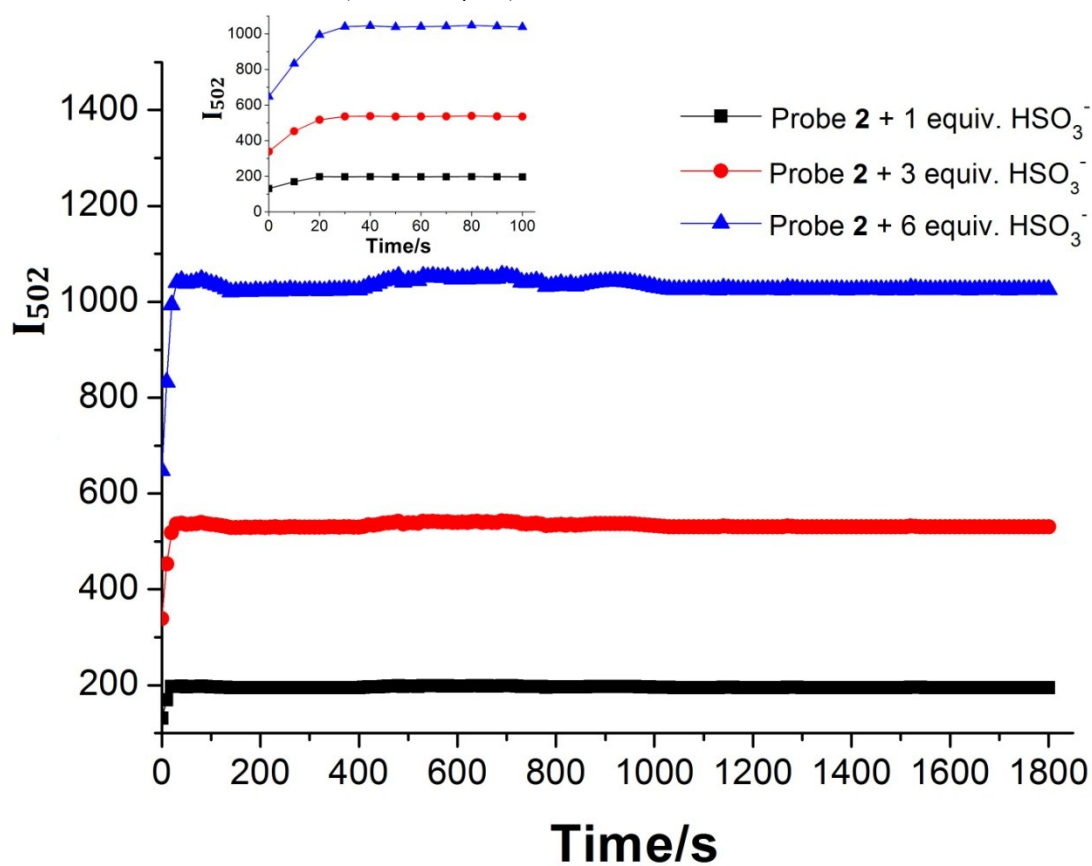

**Figure S12.** Time-dependent fluorescence intensity at 502 nm of Probe 2 (5.0 μM) upon the addition of different concentrations of NaHSO<sub>3</sub> (5.0, 15.0, and 30.0 μM) in HEPES buffer (20.0 mM, pH = 7.4).

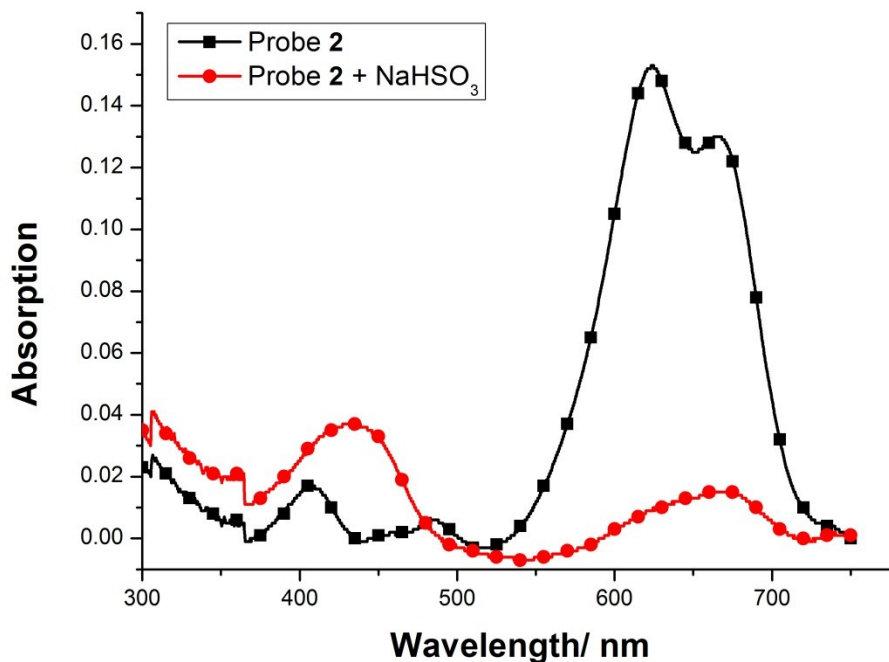

**Figure S13.** The Uv-vis absorption spectra of Probe 2 (5.0  $\mu\text{M}$ ) in the absence/presence of  $\text{NaHSO}_3$  (30.0  $\mu\text{M}$ ).

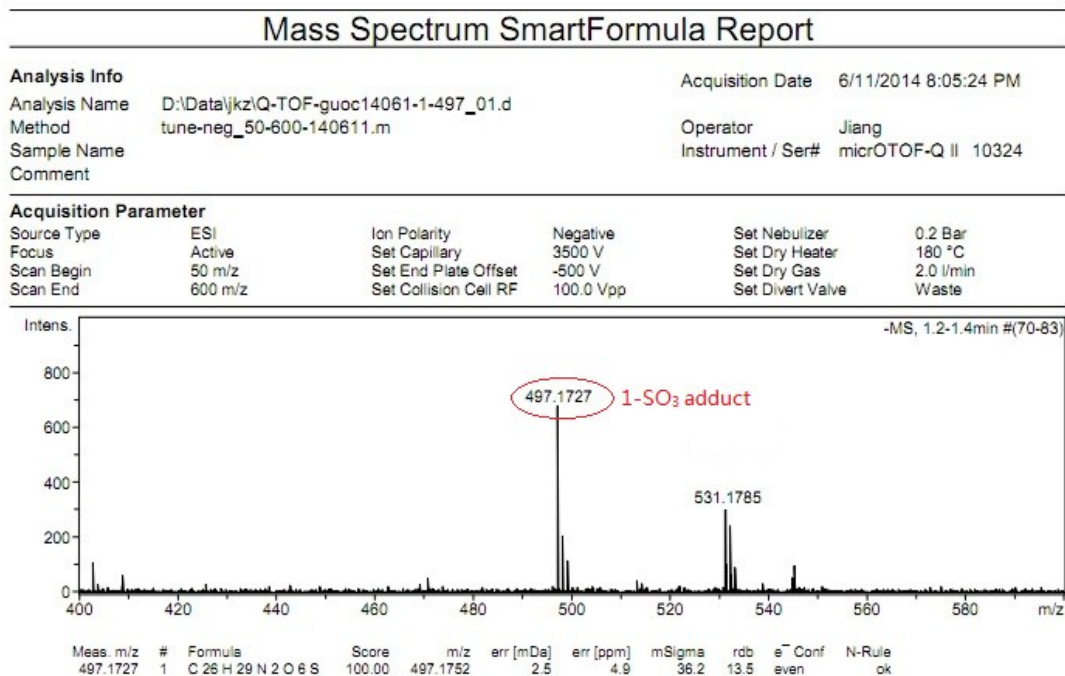

**Figure S14.** Mass spectrum of the Probe 1 (20.0  $\mu\text{M}$ ) with  $\text{NaHSO}_3$  (100.0  $\mu\text{M}$ ).



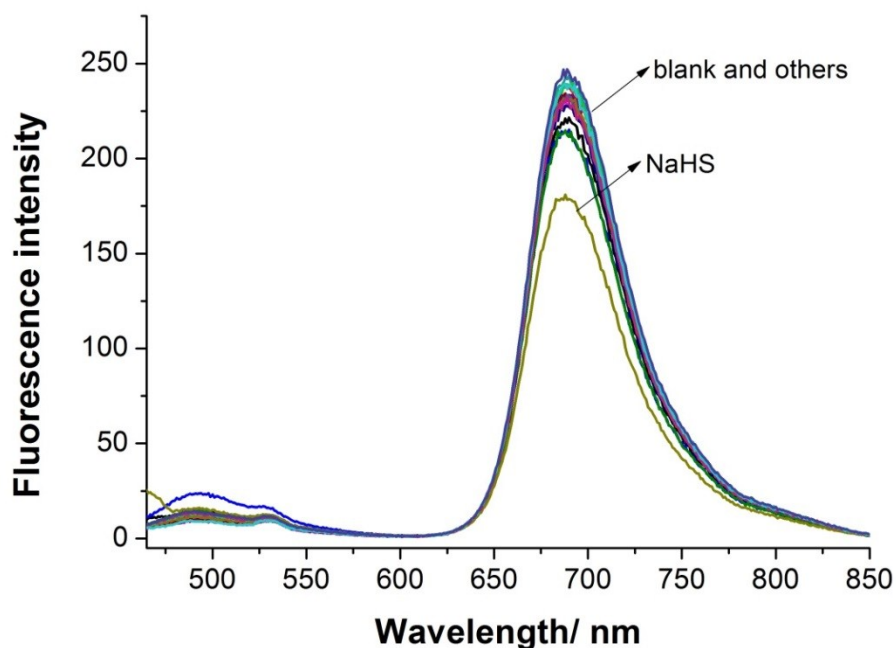

**Figure S15.** Fluorescence spectra of Probe **1** ( $5.0 \mu\text{M}$ ) in the presence of various analytes ( $25.0 \mu\text{M}$  for  $\text{F}^-$ ,  $\text{Cl}^-$ ,  $\text{Br}^-$ ,  $\text{I}^-$ ,  $\text{N}_3^-$ ,  $\text{NO}_2^-$ ,  $\text{NO}_3^-$ ,  $\text{SO}_4^{2-}$ ,  $\text{S}_2\text{O}_3^{2-}$ ,  $\text{AcO}^-$ ,  $\text{HS}^-$ ,  $\text{Mg}^{2+}$ ,  $\text{Zn}^{2+}$ ,  $\text{Ca}^{2+}$  and  $\text{K}^+$ ;  $50.0 \mu\text{M}$  for  $\text{H}_2\text{O}_2$  and  $\text{NaClO}$ ;  $0.5 \text{ mM}$  for Cys and Hcy;  $4.0 \text{ mM}$  for GSH) in HEPES buffer ( $20.0 \text{ mM}$ ,  $\text{pH} = 7.4$ ).

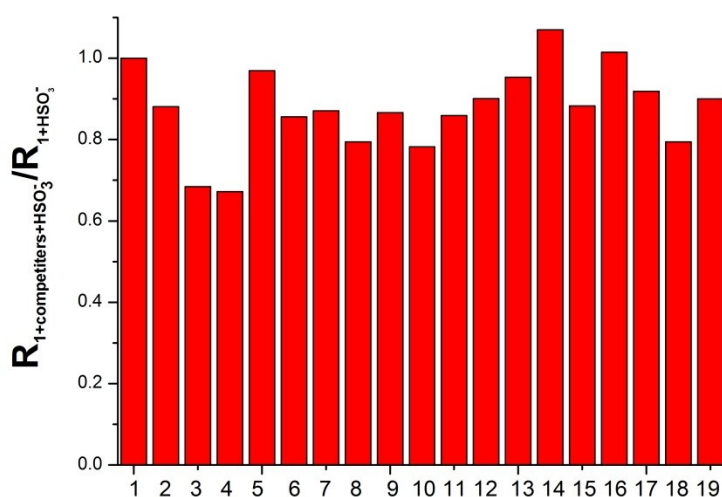

**Figure S16.** Interfering effect of various tested analytes on the fluorescence intensity of Probe **1** ( $5.0 \mu\text{M}$ ) in response to  $\text{HSO}_3^-$  ( $25.0 \mu\text{M}$ ) in HEPES buffer ( $20.0 \text{ mM}$ ,  $\text{pH} = 7.4$ ).  $\lambda_{\text{ex}} = 450 \text{ nm}$ .  $R = I_{489}/I_{690}$ . Bars:  $25.0 \mu\text{M}$  for (1)blank, (2)  $\text{Br}^-$ , (3)  $\text{F}^-$ , (4)  $\text{I}^-$ , (5)  $\text{Cl}^-$ , (6)  $\text{S}_2\text{O}_3^{2-}$ , (7)  $\text{AcO}^-$ , (8)  $\text{SO}_4^{2-}$ , (9)  $\text{NO}_2^-$ , (10)  $\text{NO}_3^-$ , (11)  $\text{N}_3^-$ , (12)  $\text{HS}^-$ , (13)

Mg<sup>2+</sup>, (14) Zn<sup>2+</sup>; 50.0 μM for (15) H<sub>2</sub>O<sub>2</sub>, (16) NaClO; 0.5 mM for (17) Cys, (18) Hcy; 4.0 mM for (19) GSH.

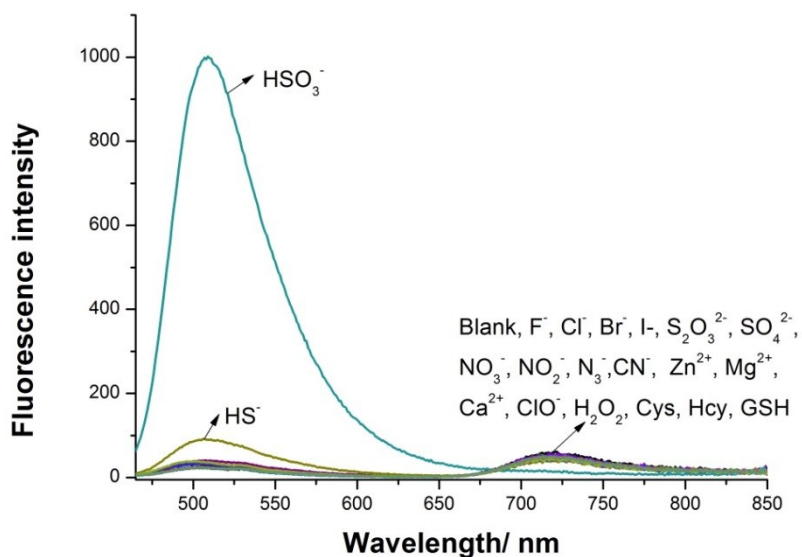

**Figure S17.** Fluorescence spectra of Probe **2** in the presence of various analytes (30.0 μM for F<sup>-</sup>, Cl<sup>-</sup>, Br<sup>-</sup>, I<sup>-</sup>, N<sub>3</sub><sup>-</sup>, CN<sup>-</sup>, NO<sub>2</sub><sup>-</sup>, NO<sub>3</sub><sup>-</sup>, SO<sub>4</sub><sup>2-</sup>, S<sub>2</sub>O<sub>3</sub><sup>2-</sup>, HS<sup>-</sup>, Mg<sup>2+</sup>, Zn<sup>2+</sup> and Ca<sup>2+</sup>; 50.0 μM for H<sub>2</sub>O<sub>2</sub> and NaClO; 0.5 mM for Cys and Hcy; 4.0 mM for GSH) in HEPES buffer (20.0 mM, pH =7.4).

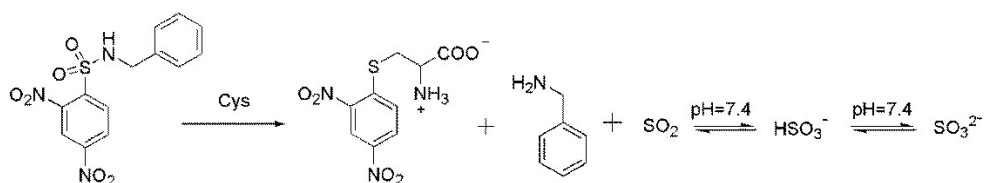

**Figure S18.** The reaction of SO<sub>2</sub> donor in the presence of Cys in pH 7.4 buffered solution.

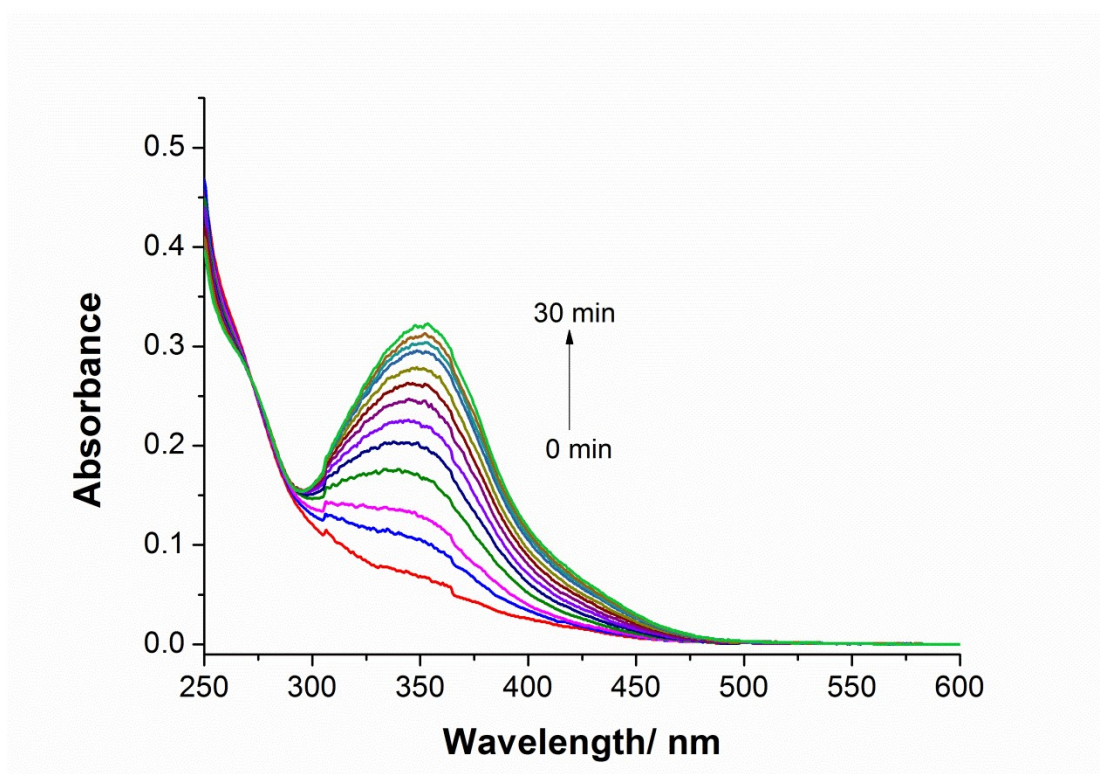

**Figure S19.** Time-dependent Uv-vis absorption spectra of  $\text{SO}_2$  donor ( $40.0 \mu\text{M}$ ) in the presence of Cys ( $400.0 \mu\text{M}$ ) in HEPES buffer ( $20.0 \text{ mM}$ ,  $\text{pH} = 7.4$ ).

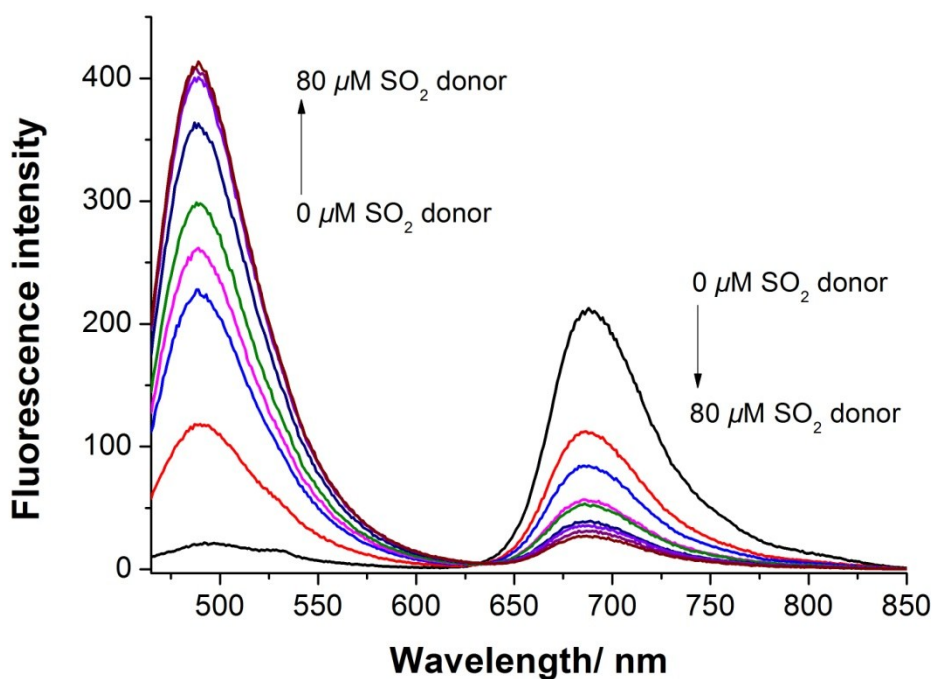

**Figure S20.** Fluorescence spectra of Probe **1** ( $5 \mu\text{M}$ ) in the presence of  $\text{SO}_2$  donor ( $0.0$ - $80.0 \mu\text{M}$ ) in HEPES solution ( $20 \text{ mM}$ ,  $\text{pH} = 7.4$ , containing  $400.0 \mu\text{M}$  Cys). Each spectrum was recorded after incubation for 30 min at room temperature.

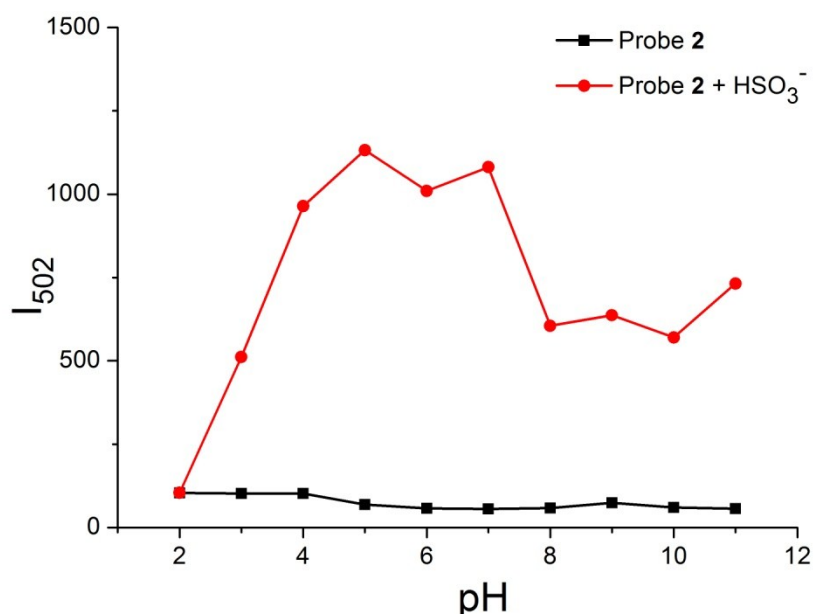

**Figure S21.** The fluorescence intensity at 502 nm of Probe 2 (5.0  $\mu\text{M}$ ) in the absence and presence of  $\text{HSO}_3^-$  (25.0  $\mu\text{M}$ ) at varied pH values.

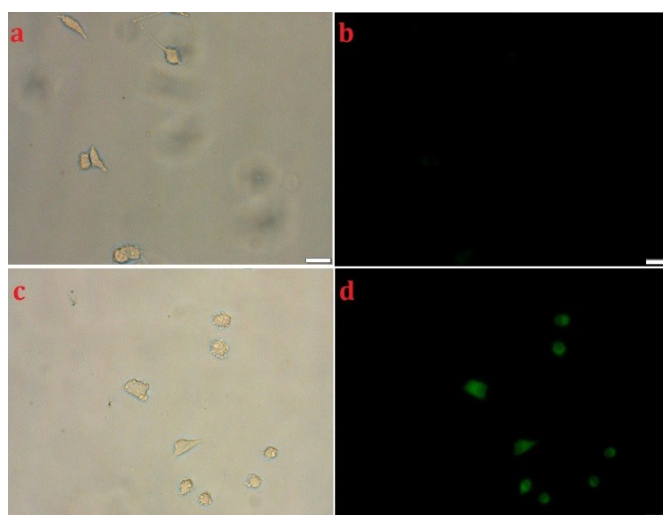

**Figure S22.** Images of living A431 cells. Top row: cells incubated with Probe 2 (5.0  $\mu\text{M}$ ) for 30 min. Bottom row: cells pretreated with  $\text{NaHSO}_3$  (50.0  $\mu\text{M}$ ) for 30 min, then washed with PBS buffer (20 mM, pH = 7.4) and further incubated with Probe 2 (5.0  $\mu\text{M}$ ) for 30 min. (a), (c) Bright field images; (b), (d) Fluorescence images (excited with blue light). Scale bar = 50  $\mu\text{m}$ .

### MTT assays

MTT assays were performed to evaluate the cytotoxicity of Probe 1 and 2. HepG2 cells were grown in Dulbecco's Modified Eagle's medium (DMEM) supplemented with 10% FBS (Fetal Bovine Serum) and 1% antibiotics at 37 °C in a humidified environment containing 5% CO<sub>2</sub>. Before the experiment, the cells were placed in 96-well plates, followed by the addition of different concentrations of Probe 1 or 2 (0.0 to 20.0 μM). The cells were then incubated at 37 °C in an atmosphere of 5% CO<sub>2</sub> and 95% air for 48 h, followed by MTT assays (n = 10). Untreated assay with Minimum Essential medium (n = 10) was also conducted under the same conditions.

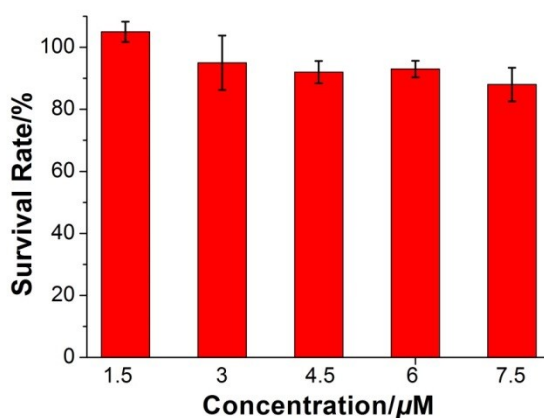

**Figure S23.** Percentage of viable HepG2 cells after treatment with various concentrations of Probe 1 for 48 hours.

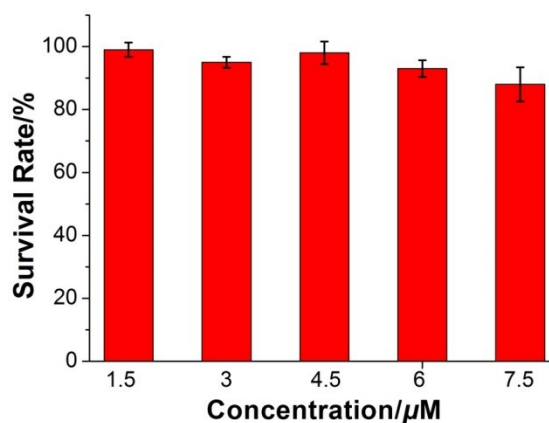

**Figure S24.** Percentage of viable HepG2 cells after treatment with various concentrations of Probe 2 for 48 hours.

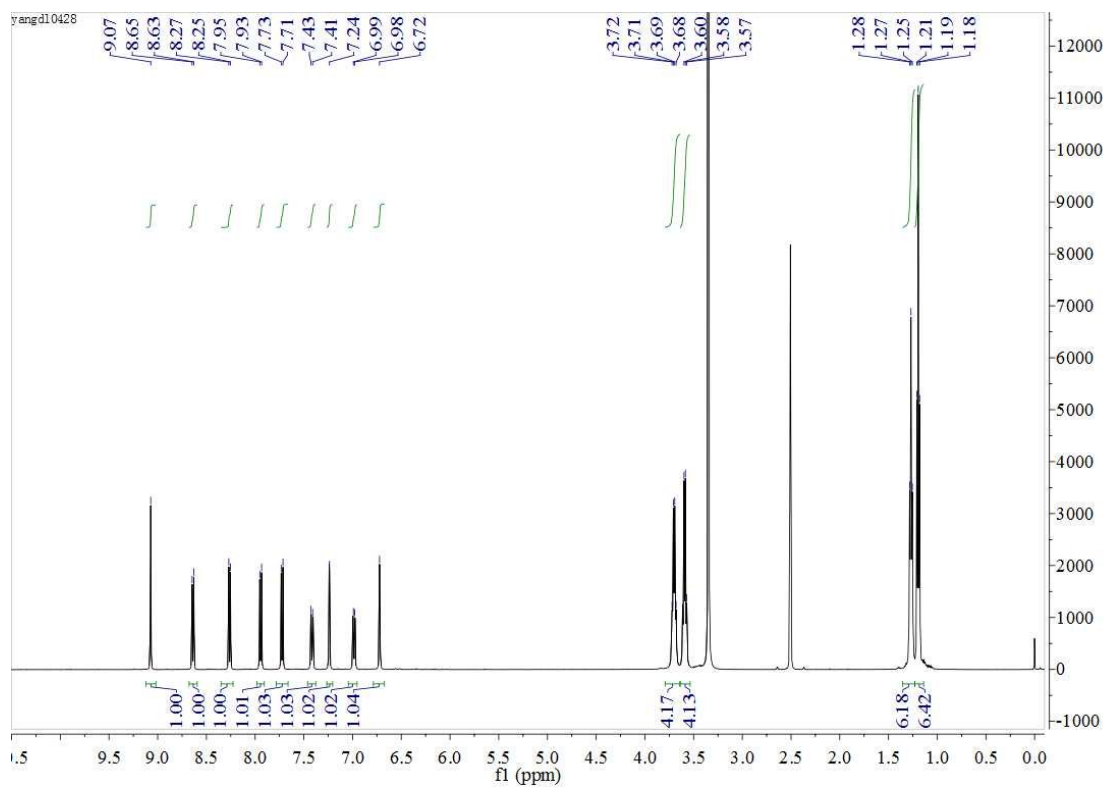

Figure S25.  $^1\text{H}$  NMR spectrum of Probe 1.

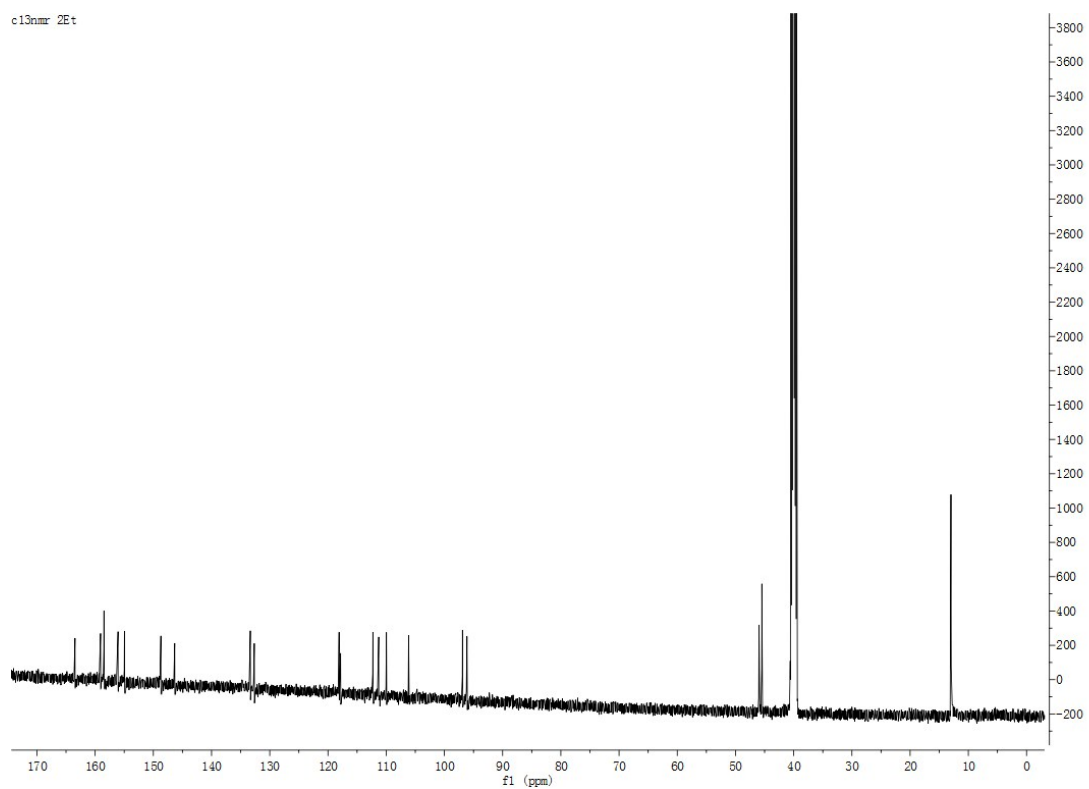

Figure S26.  $^{13}\text{C}$  NMR spectrum of Probe 1.

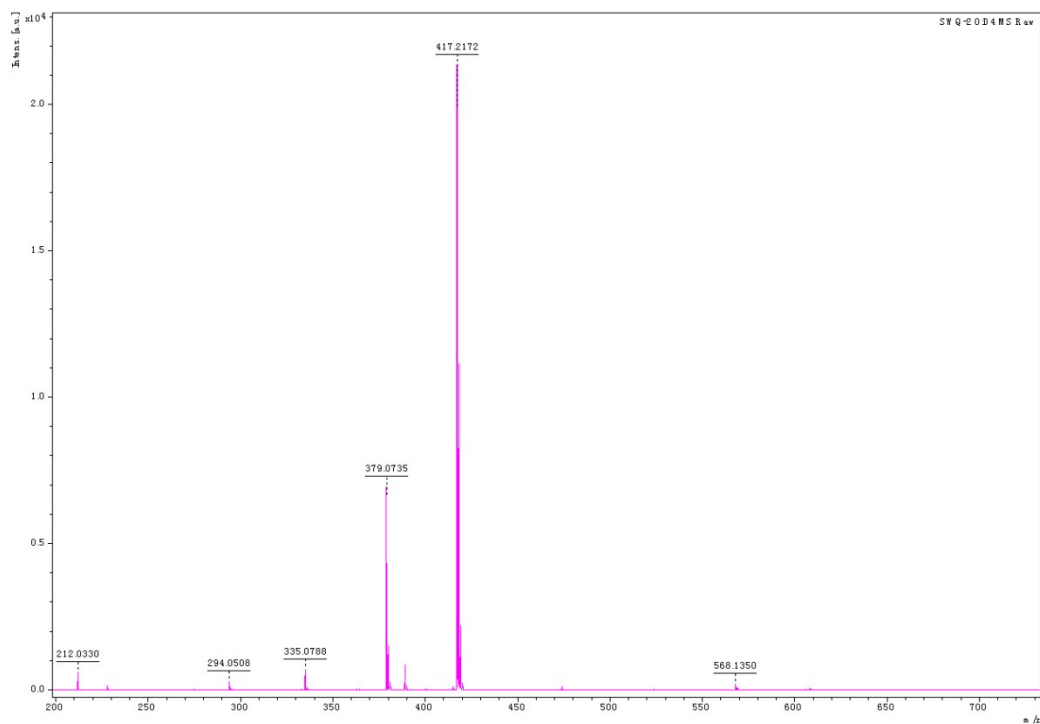

**Figure S27.** Mass spectrum of Probe 1.

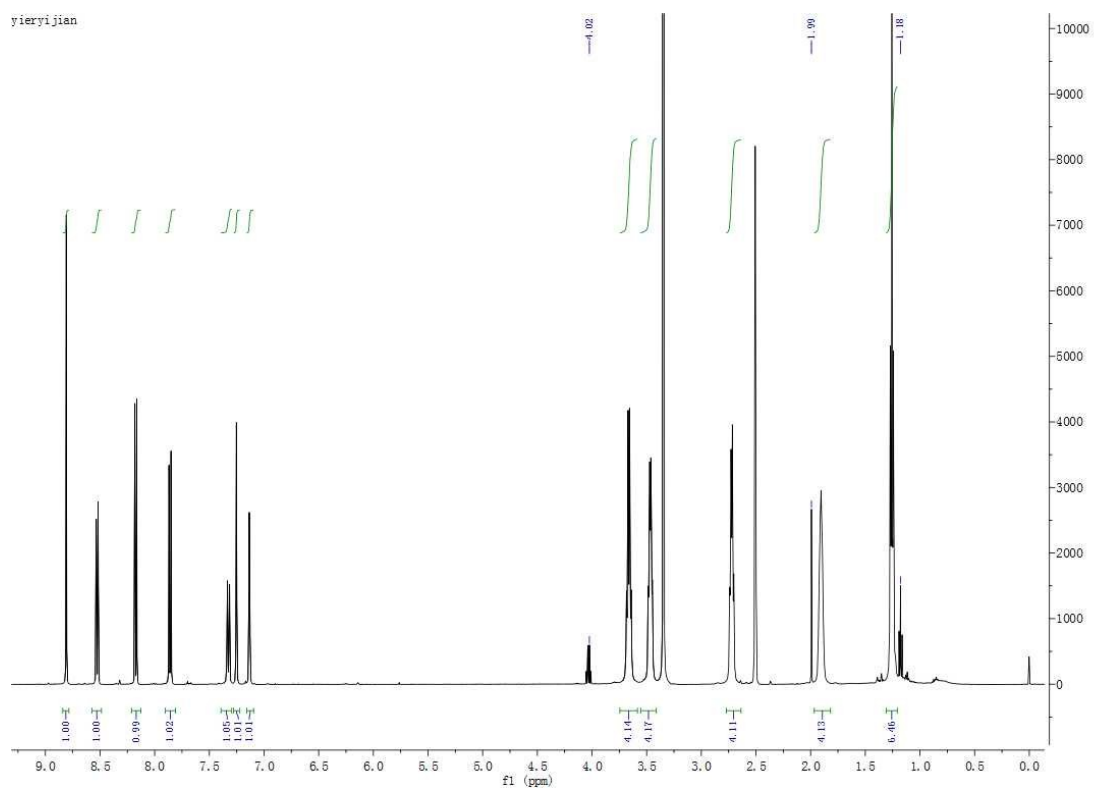

**Figure S28.** <sup>1</sup>H NMR spectrum of Probe 2.

<sup>13</sup>C NMR for JULOBIND

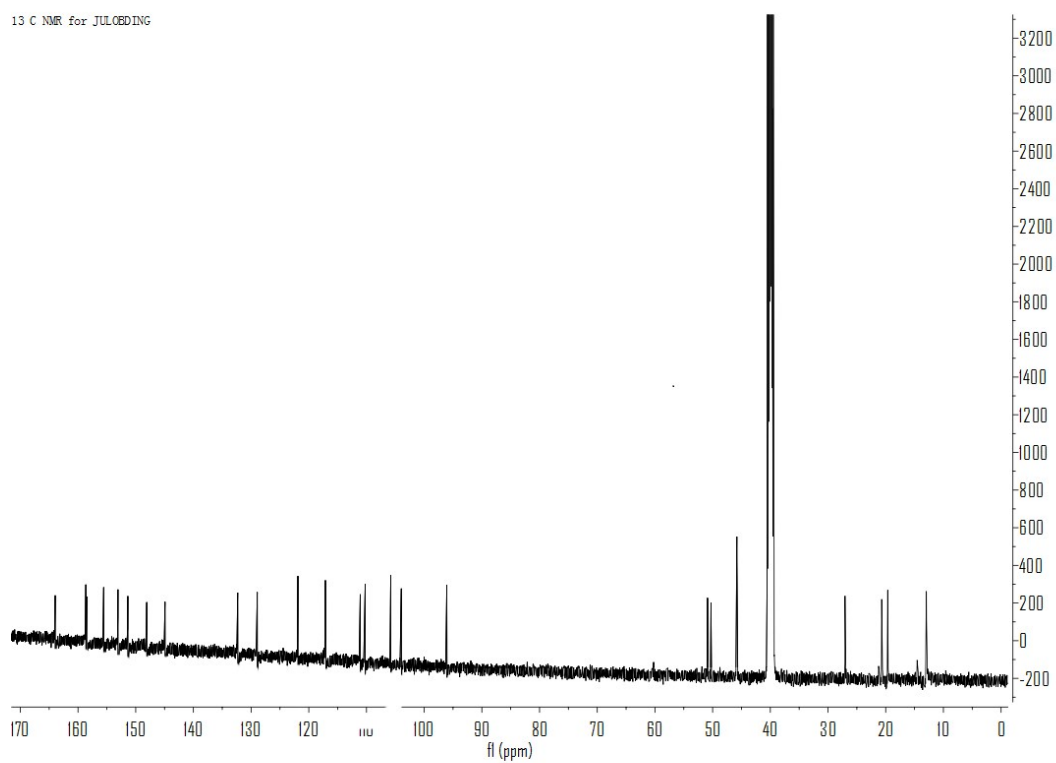

**Figure S29.** <sup>13</sup>C NMR spectrum of Probe 2.
